# Supplementary material
Source: PubMed Central journal article supplement (PMC6494087)

Online supplement . CONSORT Diagram

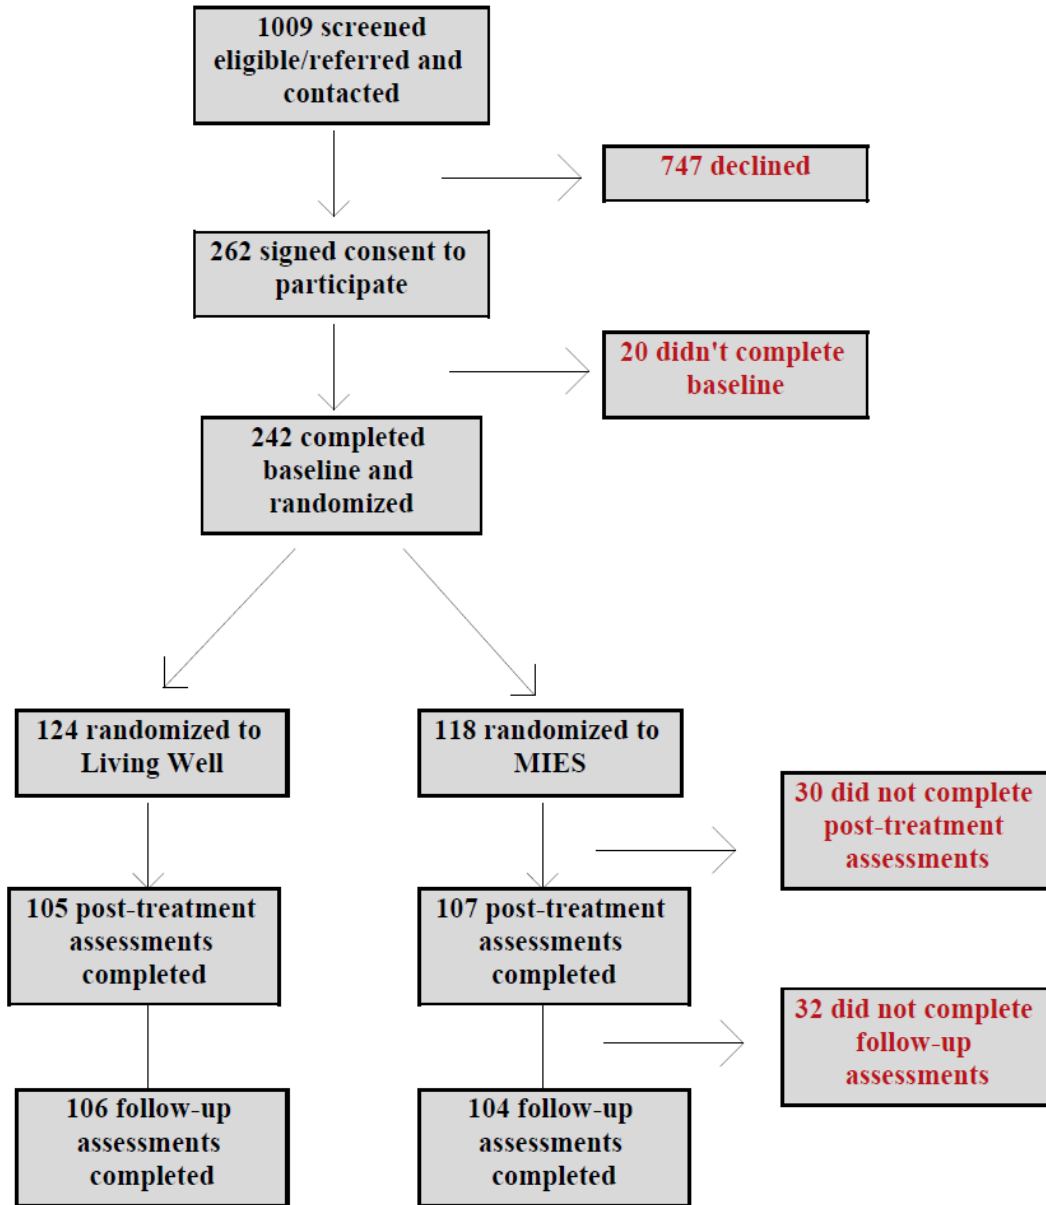

Supplement: NIHMS1022638-supplement-1.pdf [file NIHMS1022638-supplement-1.pdf]
